# Supplementary material for: metaSPAdes: a new versatile metagenomic assembler
Source: HighWire-hosted journal article supplement (doi:10.1101/gr.213959.116), 2017-03-15
Supplement: Supplemental_Table_S1.xlsx [file Supplemental_Table_S1.xlsx]

## Sheet: Performance stats
dataset/assembler	metaSPAdes	MEGAHIT	IDBA-UD	Ray-Meta
SYNTH	5h 15m (26.9)	6h 59m (8.6)	4h 26m (135.3)	9h 47m (38.5)
HMP	5h 42m (16.3)	1h 28m (7.5)	4h 51m (234.7)	6h 52m (25.8)
MARINE	54h 4m (236.9)	8h 43m (39.1)	33h 13m (179.9)	28h 18m (163.7)
SOIL	28h 29m (134.2)	3h 39m (18.5)	13h 20m (114.6)	10h 7m (63.9)
Table S1. The running time and memory footprint (in Gb) of various metagenomic assemblers. All assemblies were constructed using 16 cores on a machine with Intel(R) Xeon(R) CPU E7-4880 v2 2.50GHz processors and 1,5TB of RAM. metaSPAdes was launched with (-m 400) option to setup the hard memory constraint.
