# Supplementary material for: metaSPAdes: a new versatile metagenomic assembler
Source: HighWire-hosted journal article supplement (doi:10.1101/gr.213959.116), 2017-03-15
Supplement: Supplemental_Table_S2.xlsx [file Supplemental_Table_S2.xlsx]

## Sheet: SYNTH refs
No	RefSeq ID	Organism	Genome Size (Mbp)	Average coverage	Abbreviation
1	58009	Nanoarchaeum equitans	0.5	318	Neq
2	57753	Pyrococcus horikoshii	1.7	138	Pho
3	61589	Rhodopirellula baltica	7.2	137	Rba
4	58935	Thermotoga sp. RQ2	1.9	128	ThRQ2
5	57717	Archaeoglobus fulgidus	2.2	124	Afu
6	57647	Nitrosomonas europaea	2.8	117	Neu
7	59065	Thermotoga neapolitana DSM 4359	1.9	112	ThDSM4359
8	57807	Sulfolobus tokodaii	2.7	102	Sto
9	58857	Hydrogenobaculum sp. Y04AAS1	1.6	94	HY04AAS1
10	58813	Gemmatimonas aurantiaca	4.6	90	Gau
11	57727	Pyrobaculum aerophilum IM2	2.2	90	PaeIM2
12	57873	Pyrococcus furiosus	1.9	86	Pfu
13	58129	Chlorobium phaeovibrioides	2	84	Cvi
14	59127	Acidobacterium capsulatum	4.1	82	Aca
15	58787	Pyrobaculum calidifontis	2	80	Pca
16	43333	Aciduliprofundum boonei	1.5	78	Abo
17	57743	Geobacter sulfurreducens PCA	3.8	76	GsuPCA
18	58119	Persephonella marina EX-H1	2	74	PmaEX-H1
19	54191	Sulfitobacter sp. EE-36	3.6	73	SEE-36
20	54259	Sulfitobacter sp. NAS-14.1	4	72	SNAS-14.1
21	57713	Methanocaldococcus jannaschii	1.7	65	Mja
22	57583	Treponema denticola	2.8	63	Tde
23	57883	Methanopyrus kandleri	1.7	62	Mka
24	58409	Pyrobaculum arsenaticum	2.1	55	Pas
25	54637	Sulfurihydrogenibium yellowstonense SS-5	1.5	55	SyeSS-5
26	57897	Chlorobium tepidum	2.2	53	Cte
27	58741	Methanococcus maripaludis C5	1.8	51	MmaC5
28	59177	Dictyoglomus turgidum	1.9	50	Dtu
29	58655	Thermotoga petrophila RKU-1	1.8	48	TpeRKU-1
30	58223	Thermus thermophilus HB8	1.9	47	TthHB8
31	58127	Chlorobium limicola	2.8	47	Cli
32	54519	Desulfovibrio piger	2.9	46	DesPig
33	58289	Caldicellulosiruptor saccharolyticus	3	44	Csa
34	61591	Wolinella succinogenes	2.1	44	Wsu
35	58035	Methanococcus maripaludis S2	1.7	43	MmaS2
36	58133	Chlorobium phaeobacteroides	3.1	41	Cph
37	58173	Pelodictyon phaeoclathratiforme	3	38	Pph
38	57657	Chloroflexus aurantiacus J-10-fl	5.3	37	CauJ-10-fl
39	58985	Akkermansia muciniphila	2.7	35	Amu
40	57917	Clostridium thermocellum	3.8	34	Cth
41	57669	Enterococcus faecalis	3.3	33	Efa
42	58879	Porphyromonas gingivalis	2.4	33	Pgi
43	59201	Caldicellulosiruptor bescii	2.9	32	Cbe
44	58339	Thermoanaerobacter pseudethanolicus	2.4	28	Tps
45	58679	Desulfovibrio vulgaris DP4	3.7	26	DvuDP4
46	58971	Leptothrix cholodnii	4.9	26	Lch
47	57803	Nostoc sp. PCC 7120	7.2	26	NPCC7120
48	58365	Ignicoccus hospitalis	1.3	25	Iho
49	399	Bacteroides thetaiotaomicron	6.3	24	Bth
50	46845	Haloferax volcanii	2.9	24	Hvo
51	58599	Herpetosiphon aurantiacus	6.8	23	Hau
52	58659	Salinispora arenicola	5.8	21	Sar
53	58565	Salinispora tropica	5.2	20	Str
55	58253	Bacteroides vulgatus	5.2	19	DraR1
54	57665	Deinococcus radiodurans R1	3.3	19	Bvu
56	57879	Methanosarcina acetivorans C2A	5.8	18	MacC2A
57	58855	Sulfurihydrogenibium sp. YO3AOP1	1.8	17	SYO3AOP1
58	57613	Bordetella bronchiseptica	5.3	15	Bbr
59	57885	Fusobacterium nucleatum nucleatum	2.2	14	Fnu
60	57863	Ruegeria pomeroyi	4.6	13	Rpo
61	58095	Zymomonas mobilis	2.1	13	Zmo
62	57823	Burkholderia xenovorans LB400	9.7	9	BxeLB400
63	58743	Shewanella baltica OS185	5.3	9	SbaOS185
64	58775	Shewanella baltica OS223	5.4	6	SbaOS223
Table S2. The list of 64 reference genomes for the SYNTH dataset. References marked by red correspond to the draft assemblies (genomes represented by multiple contigs). The reference marked by blue is closely related to one of the abundant species represented by a draft assembly. References marked by yellow are likely to significantly differ from their counterparts in the sample. For more details…
