# Supplementary material for: metaSPAdes: a new versatile metagenomic assembler
Source: HighWire-hosted journal article supplement (doi:10.1101/gr.213959.116), 2017-03-15
Supplement: Supplemental_Table_S3.xlsx [file Supplemental_Table_S3.xlsx]

## Sheet: SYNTH extended results
No.	Abbreviation	Avg. Coverage	RefSeq ID	NGA50				Intragenomic misassemblies				Intergenomic misassemblies				Genome fraction
				metaSPAdes	MEGAHIT	IDBA-UD	Ray-Meta	metaSPAdes	MEGAHIT	IDBA-UD	Ray-Meta	metaSPAdes	MEGAHIT	IDBA-UD	Ray-Meta	metaSPAdes	MEGAHIT	IDBA-UD	Ray-Meta
1	Neq	318	58009	381775	474066	474066	474106	0	0	1	0	1	0	0	0	99.661	99.616	99.661	99.624
2	Pho	138	57753	293747	114964	298215	296660	2	0	1	6	0	0	1	0	99.603	99.417	99.537	99.855
3	Rba	137	61589	183456	133490	220154	146710	5	1	3	23	0	1	0	0	98.774	98.657	98.775	99.121
4	ThRQ2	128	58935	45835	3179	6952	15092	0	0	0	32	1	0	1	6	98.275	80.956	89.745	96.105
5	Afu	124	57717	183804	82225	85088	173589	2	2	2	6	1	0	0	0	99.207	99.158	99.168	99.427
6	Neu	117	57647	46392	45729	46450	46140	2	2	2	6	0	0	0	0	95.808	95.598	95.688	96.121
7	ThDSM4359	112	59065	57139	42515	54328	57472	0	0	0	5	0	0	1	5	90.112	95.748	96.03	96.04
8	Sto	102	57807	76823	48033	58742	67082	0	0	0	5	0	0	0	0	97.964	97.786	98.209	99.07
9	HY04AAS1	94	58857	258515	129866	173077	148210	0	0	0	3	0	0	0	0	99.088	98.822	99.021	99.178
10	Gau	90	58813	1347186	618807	979829	192207	0	0	0	3	0	0	1	0	99.926	99.924	99.927	99.583
11	PaeIM2	90	57727	91533	57037	69473	99007	1	0	2	4	0	0	0	1	98.325	98.546	98.822	99.342
12	Pfu	86	57873	59599	51223	55134	57958	0	0	0	9	0	0	0	0	98.565	98.263	98.448	99.161
13	Cvi	84	58129	177554	134822	252560	252420	1	1	3	2	0	0	0	1	99.117	98.715	98.896	99.316
14	Aca	82	59127	301792	152445	170627	131548	0	0	1	10	0	0	0	0	99.29	99.244	99.281	99.173
15	Pca	80	58787	276318	126050	140648	198398	0	0	0	2	0	0	0	1	99.544	99.579	99.732	99.554
16	Abo	78	43333	86325	86643	149294	45173	0	0	0	4	0	0	0	0	99.184	98.891	99.221	92.549
17	GsuPCA	76	57743	195995	153692	187511	120421	4	4	4	15	0	0	0	0	98.978	98.952	98.977	98.576
18	PmaEX-H1	74	58119	1063451	1063555	549093	551590	0	0	0	0	0	0	0	0	99.463	99.538	99.445	99.819
21	Mja	65	57713	121804	57235	66977	116167	1	0	0	2	0	0	0	0	99.177	99.016	99.254	99.559
22	Tde	63	57583	168453	73548	121352	140529	0	0	4	7	0	0	0	0	98.732	98.817	98.923	99.115
23	Mka	62	57883	984916	223403	331214	353428	0	0	0	3	0	0	0	0	99.926	99.9	99.976	99.785
24	Pas	55	58409	154812	127761	127089	112367	0	0	1	2	0	0	1	0	99.477	99.466	99.432	98.75
26	Cte	53	57897	169383	103753	140749	156062	0	0	1	1	0	0	0	0	98.835	98.757	98.886	99.174
27	MmaC5	51	58741	169568	22399	23198	48711	0	0	0	10	0	1	0	1	98.689	96.446	97.192	98.824
28	Dtu	50	59177	939665	113442	178437	179329	0	0	0	0	0	0	0	0	99.415	99.008	99.147	99.269
29	TpeRKU-1	48	58655	0	3064	2122	4148	0	1	1	8	1	0	0	1	14.2	79.867	59.532	66.549
30	TthHB8	47	58223	60940	54274	58842	36120	1	0	0	5	0	0	0	0	99.039	99.091	99.21	98.21
31	Cli	47	58127	102105	79272	104338	83504	2	2	5	5	0	0	3	4	96.695	96.11	96.379	97.167
33	Csa	44	58289	39297	25705	26050	35961	5	8	9	19	3	2	4	9	92.484	91.271	92.797	94.24
34	Wsu	44	61591	156243	138697	138697	91425	0	0	0	1	0	0	0	0	97.875	97.902	97.917	98.079
35	MmaS2	43	58035	109948	22764	15651	73745	1	0	0	6	0	0	0	1	98.27	96.988	94.452	98.97
36	Cph	41	58133	40887	38781	43588	40115	5	1	3	8	0	0	6	7	94.077	93.12	93.634	94.71
37	Pph	38	58173	89343	76016	76016	56029	1	3	2	9	0	0	3	2	97.029	96.626	96.602	97.1
38	CauJ-10-fl	37	57657	84420	54114	69896	29534	7	6	9	31	0	0	0	0	98.473	98.062	98.232	97.297
39	Amu	35	58985	189693	109463	130111	100644	2	0	0	2	0	0	0	0	98.744	98.678	98.713	98.635
40	Cth	34	57917	74152	52270	57019	52585	3	2	3	2	0	0	0	0	94.456	94.362	94.738	94.901
41	Pgi	33	58879	30817	27436	31146	22360	3	2	3	6	0	0	0	0	93.327	93.122	93.379	92.895
43	Cbe	32	59201	40725	26834	26578	38981	0	3	8	5	3	2	4	9	91.229	91.135	89.56	93.807
44	Tps	28	58339	54527	48090	51478	32078	0	1	1	6	0	0	0	0	94.305	94.039	94.305	93.093
45	Lch	26	58971	15689	14708	14459	3527	1	1	8	7	1	2	54	0	96.003	95.601	95.61	81.675
46	NPCC7120	26	57803	137846	79686	97668	27668	3	1	3	14	0	0	0	0	98.809	98.819	98.891	96.343
48	Iho	25	58365	212262	78313	78313	23083	0	0	0	2	0	0	0	0	99.786	99.654	99.641	97.865
49	Bth	24	399	132888	108389	131935	27812	7	3	5	18	1	1	3	0	98.501	98.294	98.497	94.452
50	Hvo	24	46845	26447	22741	21206	3756	0	0	1	4	0	1	11	0	98.005	98.02	97.983	84.089
51	Hau	23	58599	112847	124256	139818	14415	3	3	1	19	0	0	0	0	98.319	98.32	98.381	92.885
52	Sar	21	58659	10460	9408	8588	1952	2	4	2	1	8	16	60	2	93.505	94.228	92.797	70.196
53	Str	20	58565	9743	8123	7326	1819	1	1	6	5	8	16	48	2	94.137	94.61	91.961	68.977
54	Bvu	19	58253	88327	79094	78318	7675	1	3	7	8	1	1	3	0	95.856	95.777	95.736	89.926
55	DraR1	19	57665	15750	13985	15007	1719	0	0	0	1	0	0	15	0	96.621	96.187	96.435	66.798
56	MacC2A	18	57879	36848	22334	25819	4922	9	7	11	13	0	0	0	0	94.697	94.53	94.773	87.536
58	Bbr	15	57613	5650	5188	4900	1150	3	3	28	0	3	7	100	0	89.45	88.478	88.681	54.395
60	Rpo	13	57863	12719	11919	13199	1105	0	0	10	0	1	0	34	0	96.928	96.506	96.324	52.999
61	Zmo	13	58095	43038	32449	53704	1378	1	1	1	0	0	0	0	0	98.8	98.943	98.926	63.479
62	BxeLB400	9	57823	4821	4238	4381	0	12	7	61	3	1	12	97	0	87.645	85.89	86.066	21.07
63	SbaOS185	9	58743	6015	2971	6376	0	5	4	6	1	4	7	12	1	85.372	80.138	87.616	43.187
64	SbaOS223	6	58775	0	1571	0	0	6	5	8	1	4	7	12	1	49.33	57.902	47.924	24.597
Table S3. NGA50 statistics number of intragenomic/intergenomic misassemblies and genome fraction for 56 reference genomes from the SYNTH dataset (see Table S2 for details). The reference genomes are arranged in the decreasing order of their coverage depths. The colors of the cells reflect how much the results of various assemblers differ from the median value (blue/red cells indicate that the res…
